# Supplementary material for: Microbial Mechanistic Insight into the Role of Yeast−Derived Postbiotics in Improving Sow Reproductive Performance in Late Gestation and Lactation Sows
Source: MDPI journal article supplement (doi:10.3390/ani14010162), 2024-01-04
Supplement: s1 [file s1]

Table S3. Effects of Y-dP supplementation in sow diet on fecal microbial genus level distribution in pregnant sows, lactating sows and weaned piglets. (%)

| Items                                | CON                     | 0.125%                  | 0.2%                    | P-values |
|--------------------------------------|-------------------------|-------------------------|-------------------------|----------|
| Pregnant sows                        |                         |                         |                         |          |
| <i>Treponema</i>                     | 5.84±1.56               | 3.83±0.85               | 3.90±0.89               | 0.38     |
| <i>Escherichia-Shigella</i>          | 3.52±1.46               | 6.12±2.19               | 3.51±0.86               | 0.40     |
| <i>UCG-002</i>                       | 5.92±0.98 <sup>b</sup>  | 6.59±1.12 <sup>b</sup>  | 9.52±0.85 <sup>a</sup>  | 0.04     |
| <i>Clostridium_sensu_stricto_1</i>   | 5.51±1.37               | 4.06±0.39               | 4.70±0.88               | 0.80     |
| <i>Bacteroides</i>                   | 0.90±0.16 <sup>a</sup>  | 0.88±0.12 <sup>a</sup>  | 0.37±0.04 <sup>b</sup>  | <0.01    |
| <i>Streptococcus</i>                 | 0.98±0.58               | 0.40±0.03               | 0.53±0.11               | 0.92     |
| <i>Aeromonas</i>                     | 0.01±0.00               | 0.01±0.00               | 0.18±0.17               | 0.13     |
| <i>Methanobrevibacter</i>            | 3.49±0.88               | 1.55±0.38               | 1.73±0.45               | 0.08     |
| <i>Comamonas</i>                     | 0.18±0.09               | 0.17±0.08               | 0.04±0.02               | 0.15     |
| <i>Limosilactobacillus</i>           | 0.13±0.03 <sup>b</sup>  | 0.68±0.23 <sup>a</sup>  | 0.71±0.13 <sup>a</sup>  | 0.01     |
| <i>Others</i>                        | 69.67±2.07              | 74.09±2.42              | 73.12±1.49              | 0.28     |
| Lactating sows                       |                         |                         |                         |          |
| <i>Lactobacillus</i>                 | 4.02±0.86               | 1.50±0.44               | 2.42±0.45               | 0.06     |
| <i>UCG-002</i>                       | 9.34±1.72               | 8.10±0.93               | 7.51±1.09               | 0.61     |
| <i>Treponema</i>                     | 4.90±0.38               | 4.86±1.36               | 6.36±1.43               | 0.58     |
| <i>Christensenellaceae_R-7_group</i> | 3.87±0.36               | 5.26±0.97               | 5.04±1.47               | 0.54     |
| <i>Methanobrevibacter</i>            | 1.42±0.26               | 0.98±0.27               | 1.80±0.09               | 0.05     |
| <i>Pseudomonas</i>                   | 0.53±0.11               | 3.51±1.87               | 0.53±0.14               | 0.55     |
| <i>Prevotella</i>                    | 2.27±0.16 <sup>a</sup>  | 1.76±0.32 <sup>ab</sup> | 1.29±0.19 <sup>b</sup>  | 0.02     |
| <i>Limosilactobacillus</i>           | 1.47±0.29               | 0.50±0.19               | 0.97±0.25               | 0.07     |
| <i>Rikenellaceae_RC9_gut_group</i>   | 5.07±0.59               | 4.07±0.36               | 4.61±0.71               | 0.55     |
| <i>Bacteroides</i>                   | 0.81±0.13               | 0.50±0.13               | 0.66±0.19               | 0.40     |
| <i>Others</i>                        | 64.65±2.26              | 64.73±0.90              | 66.72±2.18              | 0.72     |
| Piglets                              |                         |                         |                         |          |
| <i>Lactobacillus</i>                 | 4.99±0.86               | 4.16±0.98               | 7.82±2.95               | 0.84     |
| <i>Bacteroides</i>                   | 4.59±1.08               | 14.66±4.38              | 11.34±2.95              | 0.08     |
| <i>UCG-002</i>                       | 4.76±1.38               | 1.92±0.34               | 2.21±0.63               | 0.07     |
| <i>Fusobacterium</i>                 | 0.73±0.24 <sup>a</sup>  | 2.64±1.08 <sup>b</sup>  | 0.10±0.04 <sup>a</sup>  | 0.01     |
| <i>Escherichia-Shigella</i>          | 5.65±1.45               | 7.86±0.71               | 7.01±2.40               | 0.67     |
| <i>Rikenellaceae_RC9_gut_group</i>   | 0.35±0.13               | 0.86±0.54               | 1.20±0.34               | 0.09     |
| <i>Limosilactobacillus</i>           | 4.75±1.39               | 2.07±0.36               | 4.28±0.99               | 0.21     |
| <i>Parabacteroides</i>               | 1.89±0.21 <sup>b</sup>  | 2.22±0.41 <sup>b</sup>  | 6.91±1.78 <sup>a</sup>  | 0.01     |
| <i>Prevotella</i>                    | 0.77±0.23               | 0.87±0.27               | 0.15±0.02               | 0.05     |
| <i>Others</i>                        | 67.15±3.39 <sup>a</sup> | 50.75±4.52 <sup>b</sup> | 49.70±3.07 <sup>b</sup> | <0.01    |

Data are expressed as mean ± standard error. CON group: basal diet; 0.125% group: basal diet + 1.25g /kg Y-dP; 0.2% group: basal diet +2 g/kg Y-dP. <sup>a, b</sup> Different superscript lowercase letters indicate significant differences ( $P < 0.05$ ). n=8.
