# Supplementary material for: Microbial Mechanistic Insight into the Role of Yeast−Derived Postbiotics in Improving Sow Reproductive Performance in Late Gestation and Lactation Sows
Source: MDPI journal article supplement (doi:10.3390/ani14010162), 2024-01-04
Supplement: s1 [file s1]

Table S2. Effects of Y-dP supplementation in sow diet on fecal microbial phylum level distribution in pregnant sows, lactating sows and weaned piglets. (%)

| Items                 | CON                     | 0.125%                  | 0.2%                     | <i>P</i> -values |
|-----------------------|-------------------------|-------------------------|--------------------------|------------------|
| Pregnant sows         |                         |                         |                          |                  |
| Firmicutes            | 57.86±4.58              | 56.60±1.05              | 64.93±2.04               | 0.12             |
| Bacteroidota          | 19.28±3.52              | 22.70±2.86              | 16.45±2.80               | 0.37             |
| <i>Proteobacteria</i> | 3.74±1.62               | 10.25±3.63              | 6.57±2.32                | 0.11             |
| Spirochaetota         | 5.84±1.56               | 3.83±0.85               | 3.90±0.89                | 0.38             |
| Euryarchaeota         | 3.49±0.88               | 1.55±0.38               | 1.73±0.45                | 0.08             |
| Actinobacteria        | 0.05±0.00 <sup>b</sup>  | 0.09±0.01 <sup>a</sup>  | 0.08±0.00 <sup>a</sup>   | 0.03             |
| unidentified_Bacteria | 2.00±0.18 <sup>b</sup>  | 2.27±0.09 <sup>ab</sup> | 2.82±0.23 <sup>a</sup>   | 0.01             |
| Campylobacterota      | 0.20±0.11               | 0.12±0.03               | 0.11±0.04                | 0.90             |
| Fibrobacterota        | 0.05±0.02               | 0.03±0.01               | 0.06±0.01                | 0.20             |
| Desulfobacterota      | 0.40±0.04               | 0.46±0.05               | 0.35±0.03                | 0.22             |
| Others                | 1.68±0.22               | 1.41±0.11               | 1.53±0.15                | 0.51             |
| Lactating sows        |                         |                         |                          |                  |
| Firmicutes            | 53.01±1.99              | 54.75±2.48              | 57.14±2.71               | 0.46             |
| Bacteroidota          | 29.72±2.62              | 24.36±2.25              | 24.23±2.02               | 0.18             |
| Spirochaetota         | 4.90±0.38               | 4.86±1.36               | 6.37±1.43                | 0.58             |
| <i>Proteobacteria</i> | 2.01±0.39               | 4.39±1.94               | 2.48±0.65                | 0.82             |
| Euryarchaeota         | 1.42±0.25               | 0.98±0.27               | 1.80±0.09                | 0.07             |
| unidentified_Bacteria | 1.49±0.12               | 1.81±0.22               | 1.76±0.12                | 0.29             |
| Campylobacterota      | 0.06±0.02               | 0.03±0.01               | 0.49±0.26                | 0.15             |
| Fibrobacterota        | 0.20±0.08               | 0.15±0.04               | 0.08±0.01                | 0.16             |
| Desulfobacterota      | 0.44±0.03               | 0.45±0.08               | 0.39±0.04                | 0.75             |
| Synergistota          | 0.15±0.06               | 0.01±0.00               | 0.14±0.06                | 0.06             |
| Others                | 5.26±1.28               | 6.35±1.46               | 3.74±0.49                | 0.20             |
| Piglets               |                         |                         |                          |                  |
| Firmicutes            | 63.77±4.28 <sup>a</sup> | 38.10±4.15 <sup>b</sup> | 51.95±6.12 <sup>ab</sup> | <0.01            |
| Bacteroidota          | 20.05±3.66 <sup>b</sup> | 38.03±5.44 <sup>a</sup> | 30.46±4.47 <sup>ab</sup> | 0.04             |
| Fusobacteriota        | 0.80±0.26 <sup>b</sup>  | 2.86±1.17 <sup>a</sup>  | 0.13±0.05 <sup>b</sup>   | 0.02             |
| <i>Proteobacteria</i> | 8.45±1.88               | 10.70±2.05              | 8.01±2.34                | 0.69             |
| Synergistota          | 0.45±0.15               | 0.39±0.13               | 3.58±1.67                | 0.06             |
| unidentified_Bacteria | 1.29±0.15 <sup>a</sup>  | 0.73±0.06 <sup>b</sup>  | 0.74±0.12 <sup>b</sup>   | 0.02             |
| Verrucomicrobiota     | 0.16±0.05 <sup>b</sup>  | 1.74±0.77 <sup>a</sup>  | 0.40±0.34 <sup>ab</sup>  | 0.01             |
| Actinobacteria        | 0.25±0.06               | 1.60±0.75               | 0.09±0.02                | 0.33             |
| Actinobacteriota      | 1.31±0.50               | 0.25±0.08               | 0.59±0.15                | 0.09             |
| Euryarchaeota         | 0.28±0.13 <sup>ab</sup> | 0.06±0.03 <sup>b</sup>  | 0.43±0.12 <sup>a</sup>   | 0.02             |
| Others                | 2.29±0.26               | 2.01±0.18               | 1.79±0.31                | 0.41             |

Data are expressed as mean ± standard error. CON group: basal diet; 0.125% group: basal diet + 1.25g /kg Y-dP; 0.2% group: basal diet +2 g/kg Y-dP. <sup>a, b</sup> Different superscript lowercase letters indicate significant differences ( $P < 0.05$ ). n=8.
