# Supplementary material for: Microbial Mechanistic Insight into the Role of Yeast−Derived Postbiotics in Improving Sow Reproductive Performance in Late Gestation and Lactation Sows
Source: MDPI journal article supplement (doi:10.3390/ani14010162), 2024-01-04
Supplement: s1 [file s1]

Table S1 Composition and nutrient level of experimental basal diet

| Items                                   | Pregnancy | Lactation |
|-----------------------------------------|-----------|-----------|
| Ingredient, %                           |           |           |
| Corn                                    | 20.00     | 29.96     |
| Wheat                                   | 13.72     | --        |
| Wheatmeal, 14%CP                        | 15.00     | 15.00     |
| Soybean meal, 46%CP                     | 6.90      | 8.70      |
| Fermented soybean meal                  | --        | 5.80      |
| Expanded soybean                        | --        | 5.00      |
| Brown rice mix                          | 10.00     | 10.00     |
| Sugar beet meal granulate               | 6.00      | --        |
| Rice bran meal                          | 10.00     | 14.90     |
| Rice bran                               | 5.00      | 5.00      |
| Soybean skin                            | 7.80      | --        |
| Soybean oil                             | 1.55      | 2.00      |
| Calcium hydrogen phosphate type I       | 1.75      | 1.31      |
| Limestone                               | 0.91      | 1.15      |
| Sodium chloride                         | 0.35      | 0.35      |
| L-Lys HCl, 98%                          | 0.12      | 0.12      |
| DL-Met, 98.5%                           | 0.05      | 0.05      |
| L-Thr, 98%                              | 0.02      | 0.02      |
| L-Trp, 98%                              | 0.02      | 0.02      |
| Sodium bicarbonate                      | 0.09      | --        |
| Choline chloride, 50%                   | 0.08      | 0.08      |
| Vitamin and mineral premix <sup>1</sup> | 0.64      | 0.54      |
| Total                                   | 100.00    | 100.00    |
| Nutrient level <sup>2</sup>             |           |           |
| Crude protein, %                        | 13.50     | 17.00     |
| Calcium, %                              | 0.90      | 0.85      |
| Total phosphorus, %                     | 0.70      | 0.60      |

<sup>1</sup>Per kilogram of diet provided: Cu 20 mg; I 0.4 mg; Fe 110 mg; Mn 40 mg; Se 0.25 mg; Zn 115 mg; VA 10000 IU; VB<sub>1</sub> 6.0 mg; VB<sub>2</sub> 5.0 mg; VB<sub>6</sub> 4.0 mg; VB<sub>12</sub> 30 µg; VD<sub>3</sub> 2200 IU; VE 80 IU; VK<sub>3</sub> 4.0 mg; Biotin 0.3 mg; Folic acid 3.0 mg; Pantothenic acid 20 mg; Nicotinic acid 40 mg.

<sup>2</sup> Crude protein is calculated values, total phosphorus and calcium are measured values.
